# Supplementary material
Source: MDPI journal article supplement (https://www.mdpi.com/2504-3900/8/1/56)
Supplement: s1 [file s1]

# Risk factors for prediabetes in Auckland primary school children

Lawgun, D.; Conlon, C.A.; Beck K.L., Gammon, C.S., von Hurst, P.R.

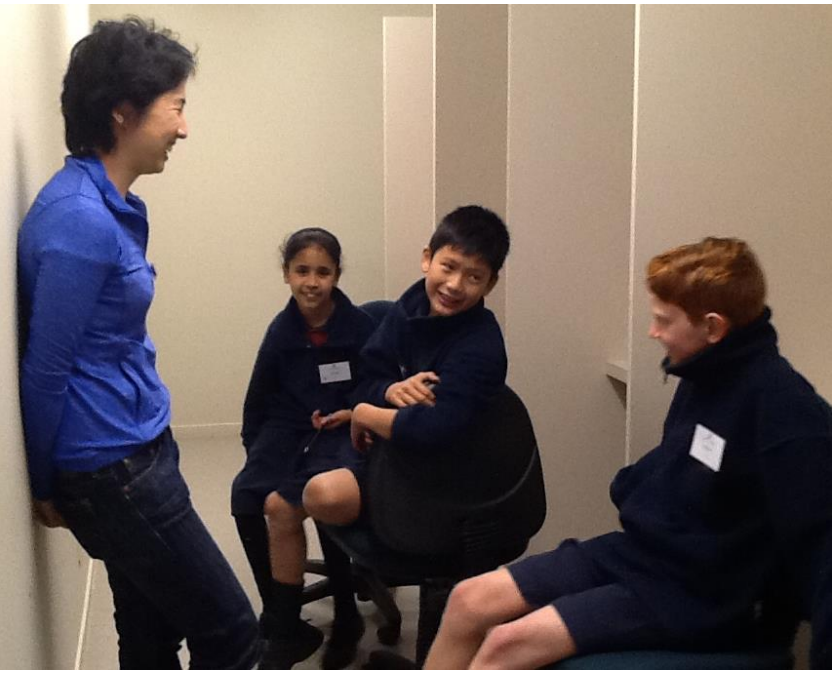

# Background

- Type 2 diabetes mellitus (T2DM) is increasing in the NZ population
- Strongly linked to ethnicity and obesity
- Diagnoses are occurring at an earlier age
- Earlier onset leads to earlier progression of complications
- Identification of at-risk children is a priority for early intervention
- Reliable, simple indicators of risk need to be found

# T2DM Screening recommendations for children and young people in New Zealand

- Obese children and young adults. (BMI > 30kg/m<sup>2</sup> or BMI > 27kg/m<sup>2</sup> for Indo-Asian\* peoples)
- The NZSSD# recommends screening if:
  - there is a family history of early onset type 2 diabetes mellitus; or
  - they are of Maori, Pacific or Indo-Asian\* ethnicity

\* Indo-Asian Indian, including Fijian Indian, Sri Lankan, Afghani, Bangladeshi, Nepalese, Pakistani, Tibetan.

Source New Zealand Primary Care Handbook. (2012) (New Zealand Guidelines Group, 2012)

# NZSSD – New Zealand Society for the Study of Diabetes

# The Children's Bone Study

- A cross-sectional study of 8-11 year-old children (n=730) recruited from 6 primary schools across Auckland.
- Glycated haemoglobin (HbA1c) was measured from a finger-prick blood test (Roche Cobas) in a subset
- Anthropometry included weight, height, waist circumference (WC) and percentage body fat (InBody 230).
- Ethnicity, gender, age, and physical activity (PA) were assessed by questionnaires completed by the child and/or parents.
- Stepwise multiple linear regression analysis was used to explore which independent variables best predicted variance in HbA1c.

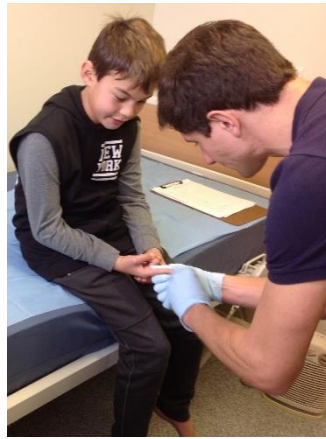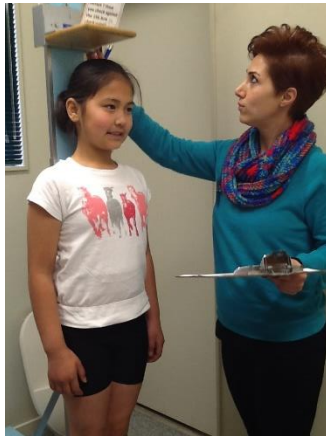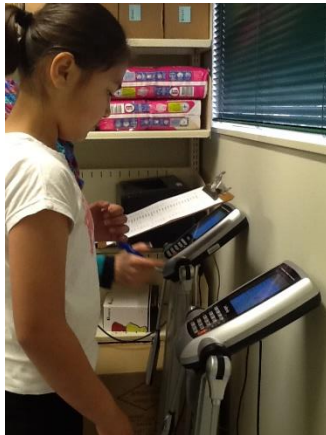

# Study Aim

- To identify reliable indicators of prediabetes risk in children, using HbA1c as the dependent variable.

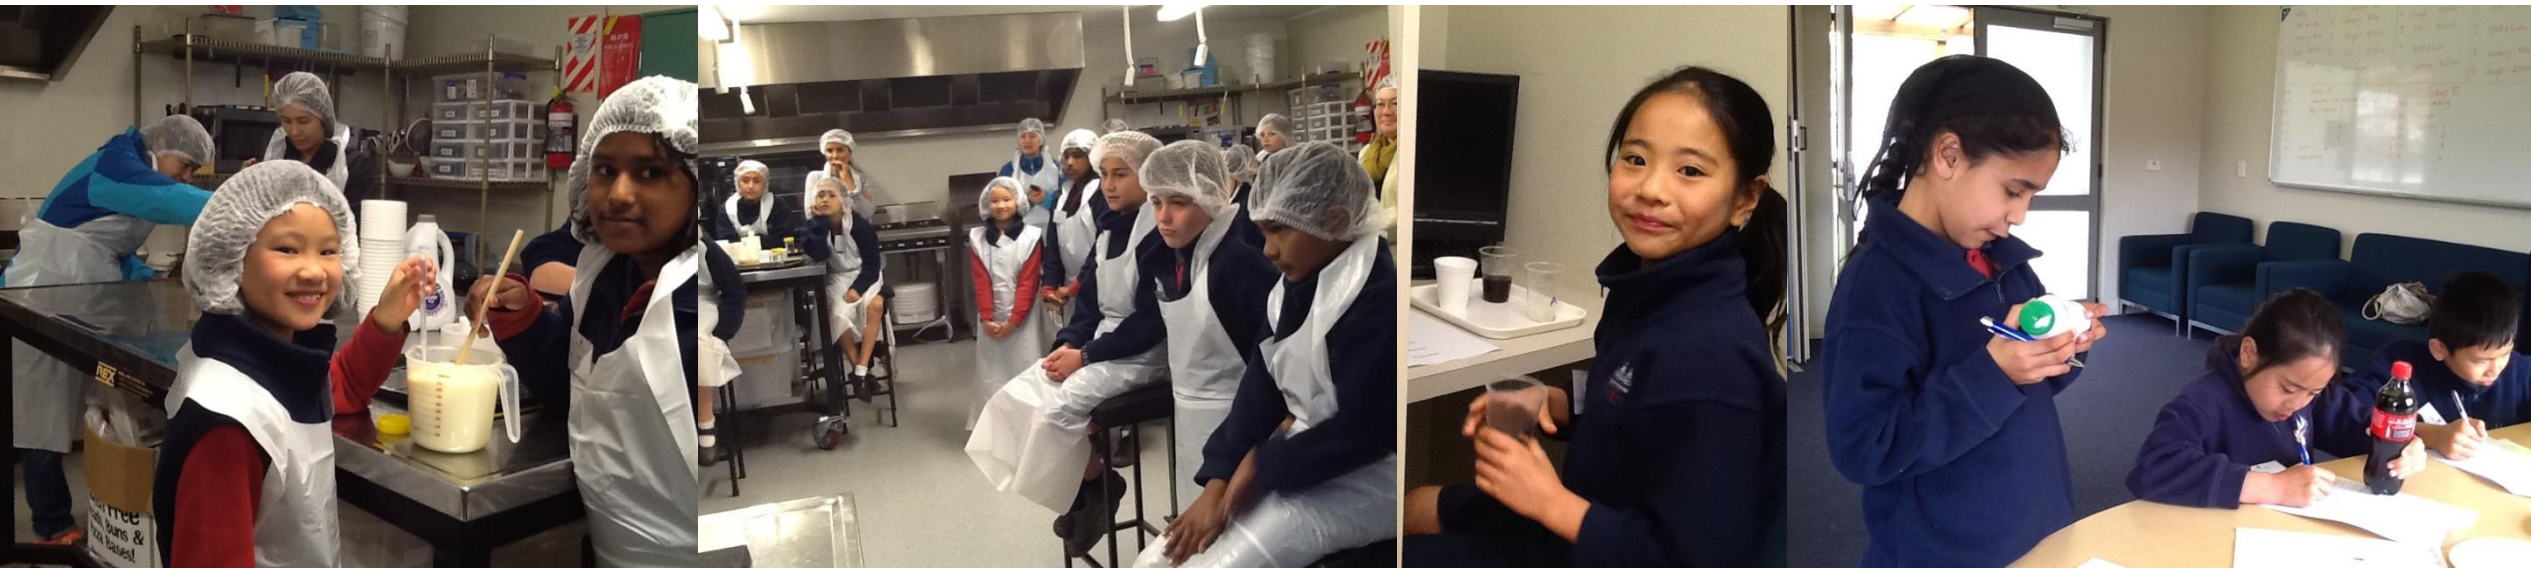

# Results

- HbA1c samples from 451 children
- Mean (SD) age 10.4(0.63) years
- 54.8% female
- 65.6% normal BMI
- A wide range of ethnicities was represented
  - European 35.7%
  - Maori 12.7%
  - Pacific 24.0%
  - South Asian 10.0%
  - Asian 9.5%
  - South East Asian 4.5%

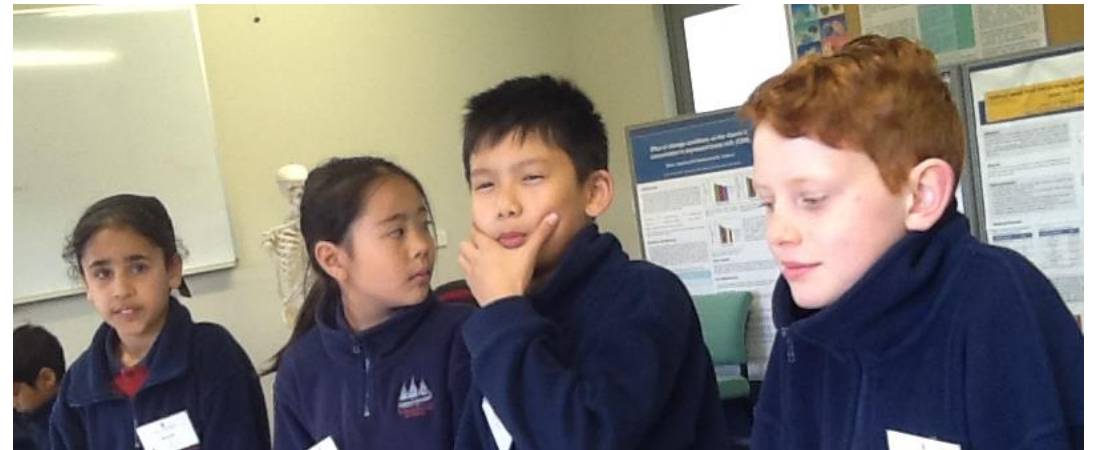

# Results

- We defined normoglycaemic as HbA1c  $\leq 39$ mmol/mol ( $<5.7\%$ ) and prediabetic as HbA1c  $>39$ mmol/mol ( $>5.7\%$ ) (American Diabetes Association, 2014).
- 71 (15.7%) children had HbA1c  $>39$ mmol/mol
  - Mean (SD) HbA1c 40(2.0)mmol/mol
  - 32 of these had BMI in the normal range (IOTF BMI cut-offs)
  - 54 had waist circumference within the normal range
  - 24 were within normal %BF range
  - South Asian children had highest % with normal anthropometric measures

# Comparison of characteristics between normal and elevated HbA1c groups

|                           | Total group<br>(n=451) | ≤ 39nmol/mol<br>(n=380) | > 39nmol/mol<br>(n=71) | P-value |
|---------------------------|------------------------|-------------------------|------------------------|---------|
| Age (years)               | 10.40 (0.63)           | 10.39 (0.63)            | 10.48 (0.60)           | N/S     |
| Height (m)                | 1.44 (0.8)             | 1.44 (0.8)              | 1.46 (0.80)            | <0.05   |
| Weight (kg)               | 39.7 (11.3)            | 38.4 (10.2)             | 46.9 (14.2)            | <0.001  |
| BMI (kg/m <sup>2</sup> )  | 18.8 (4.0)             | 18.3 (3.5)              | 21.7 (5.0)             | <0.001  |
| Waist circumference (cm)  | 63.1 (10.8)            | 61.6 (9.7)              | 71.3 (12.9)            | <0.001  |
| Waist/height ratio        | 0.44(0.07)             | 0.43 (0.06)             | 0.49 (0.08)            | <0.001  |
| Body fat (%)              | 22.9 (9.3)             | 21.7 (8.4)              | 30.1 (10.7)            | <0.001  |
| Physical activity (hours) | 3.6 (2.4)              | 3.75 (2.3)              | 3.07 (2.7)             | N/S     |
| HbA1c (mmol/mol)          | 36 (3)                 | 35 (2)                  | 40 (2)                 | <0.001  |
|                           |                        |                         |                        |         |

# Determinants of elevated HbA1c

- Ethnicity
  - South Asian
  - Pacific Island
- Anthropometric
  - Body fat percentage
  - Waist circumference
  - Waist to height ratio

# Conclusion

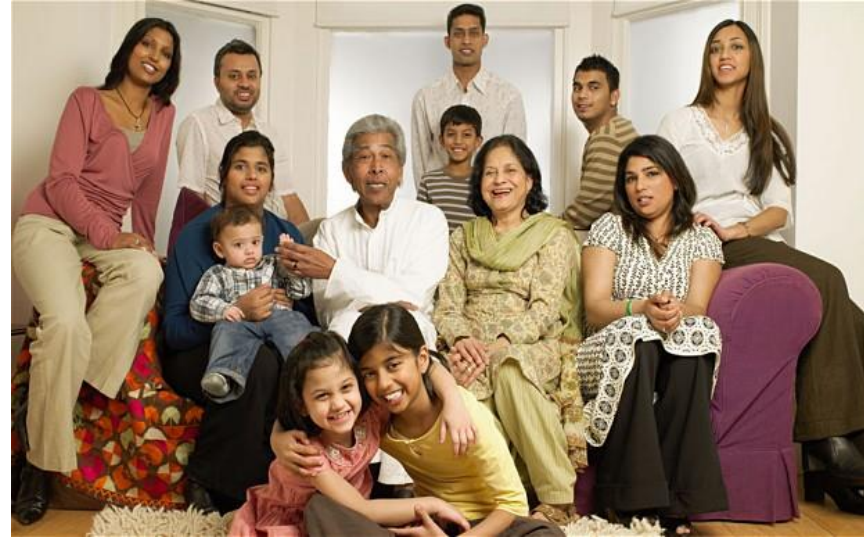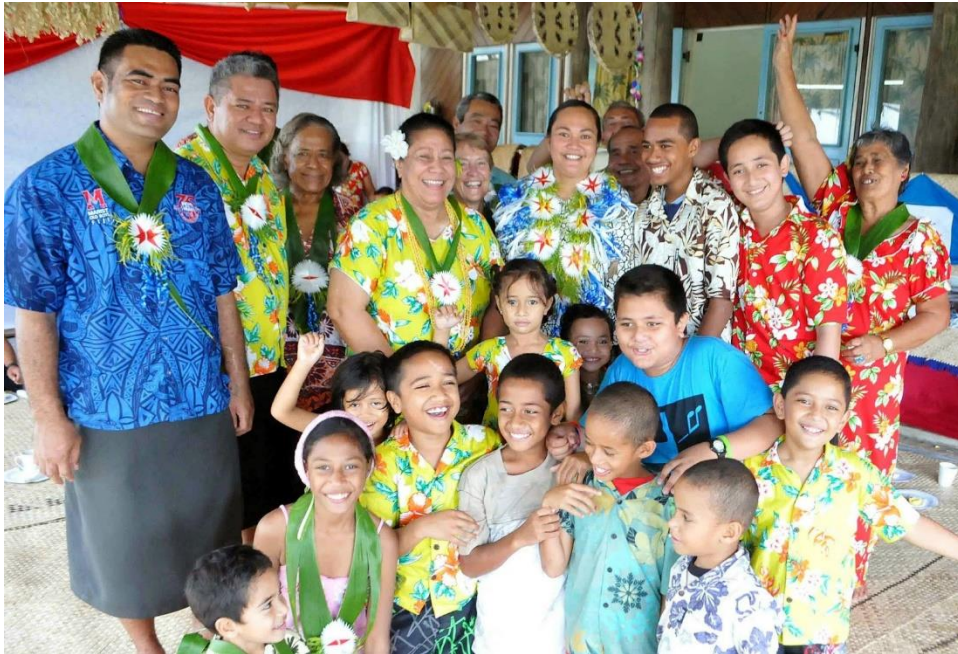

- T2DM risk can be identified early in life
- Opportunity for intervention in children in high risk populations
- High BMI is not necessarily a good indicator of increased risk

# Acknowledgements

The staff and students of  
the participating Primary  
Schools:

Meadowbank  
Whakaranga  
View Road, Waiuku  
Papatoetoe Central  
Stanley Bay  
Marist, Grey Lynn

Funding and support:

Massey University Research Fund  
Massey University Post Graduate  
Research support  
Roche diagnostics  
Fonterra Co-operative Group Ltd

The Team:

Pam von Hurst (PI)  
Cath Conlon  
Kathryn Beck  
Cheryl Gammon  
Owen Mugridge  
Donna Lawgun  
Maryam Delshad  
Emma Smirk  
Mia David  
Maya Carryer  
Hajar Mazahery  
Alex Tava  
Jasmine Foote  
PC Tong  
Tara Lemmon  
Emma Ternouth  
David Alsford
